# Supplementary material
Source: publisher figshare collection journal article supplement (https://sage.figshare.com/ndownloader/files/17922464)
Supplement: Supplementary file 1 [file 17922464]

Appendix 1. Concomitant procedures during the initial ACI

| Procedure                          | n  |
|------------------------------------|----|
| Osteotomy                          |    |
| Isolated TTO                       | 12 |
| Combined HTO/TTO                   | 5  |
| Isolated HTO                       | 5  |
| Isolated DFO                       | 1  |
| ACL reconstruction                 | 5  |
| Meniscal allograft transplantation | 2  |
| Other                              | 39 |
| No concomitant procedure           | 12 |

ACI, autologous chondrocyte implantation; TTO, tibial tubercle osteotomy; HTO, high tibial osteotomy; DFO, distal femoral osteotomy; ACL, anterior cruciate ligament

Other, Lateral release of patella retinaculum (n = 29), Q/VMO (n = 8), removal of retained suture (n = 1), removal of hardware (n = 1)

Appendix 2. Modified Cincinnati Knee Rating Scale, overall condition

|                                                                                                                                                                                                                                                                                |        |                                                                                         |
|--------------------------------------------------------------------------------------------------------------------------------------------------------------------------------------------------------------------------------------------------------------------------------|--------|-----------------------------------------------------------------------------------------|
| <input type="checkbox"/> 1 <input type="checkbox"/> 2 <input type="checkbox"/> 3 <input type="checkbox"/> 4 <input type="checkbox"/> 5 <input type="checkbox"/> 6 <input type="checkbox"/> 7 <input type="checkbox"/> 8 <input type="checkbox"/> 9 <input type="checkbox"/> 10 |        |                                                                                         |
| POOR                  FAIR                  GOOD                  VERY GOOD                  EXCELLENT                                                                                                                                                                         |        |                                                                                         |
| Poor                                                                                                                                                                                                                                                                           | (1-2)  | I have significant limitations that affect activities of daily living.                  |
| Fair                                                                                                                                                                                                                                                                           | (3-4)  | I have moderate limitations that affect activities of daily living. No sports possible. |
| Good                                                                                                                                                                                                                                                                           | (5-6)  | I have some limitations with sports but I can participate; I compensate.                |
| Very Good                                                                                                                                                                                                                                                                      | (7-8)  | I have only a few limitations with sports.                                              |
| Excellent                                                                                                                                                                                                                                                                      | (9-10) | I am able to do whatever I wish (any sport) with no problem.                            |
